# Supplementary material
Source: PubMed Central journal article supplement (PMC7760213)
Supplement: nn0c07428_si_001.pdf [file nn0c07428_si_001.pdf]

# Nanoscale Molecular Quantification of Stem Cell-Hydrogel Interactions

Stephanie A. Maynard<sup>1Δ</sup>, Amy Gelmi<sup>1‡Δ</sup>, Stacey C. Skaalure<sup>1</sup>, Isaac J. Pence<sup>1</sup>, Charlotte Lee-Reeves<sup>1</sup>, Julia E. Sero<sup>1‡‡</sup>, Thomas E. Whittaker<sup>1</sup>, Molly M. Stevens<sup>1\*</sup>

<sup>1</sup>Department of Materials, Department of Bioengineering and Institute of Biomedical Engineering, Imperial College London, London, SW7 2AZ, United Kingdom

<sup>‡</sup> Current address: Applied Chemistry and Environmental Science, School of Science, RMIT University, Melbourne, VIC 3001, Australia

<sup>‡‡</sup> Current address: University of Bath, Claverton Down, Bath, BA2 7AY, United Kingdom

Δ These authors contributed equally

\*Corresponding author

## Supplementary Information

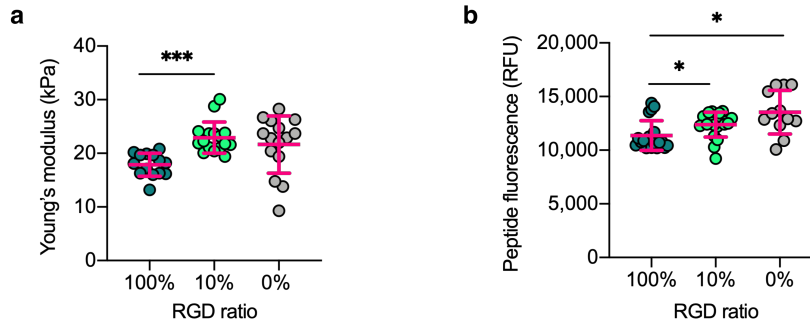

**Figure S1. Characterization of RGD peptide-functionalized hydrogels.** (a) Young's modulus of hydrogels was measured using AFM. N = 14-16 gels for each condition. Mean  $\pm$  SD for each condition are  $18 \pm 2$  kPa,  $23 \pm 3$  kPa, and  $22 \pm 5$  kPa, for 100%, 10%, and 0% RGD, respectively. (b) Fluoraldehyde assay of total peptide content in different hydrogel conditions. N = 4 measurements each from 4-5 gels per condition. Brown-Forsythe and Welch unequal variances unpaired one-way ANOVA, Dunnett's T3 multiple comparison test. Dot plots represent mean  $\pm$  SD. \* $p < 0.05$ , \*\* $p < 0.01$ , \*\*\* $p < 0.001$ .

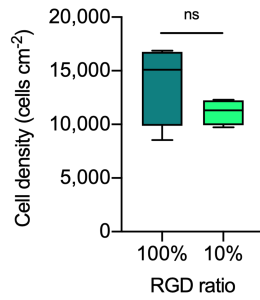

**Figure S2. Analysis of number of cells bound to hydrogels.** Total number of nuclei per  $\text{cm}^2$ , as measured from images taken at 10x magnification within a 1.2 x 1.2 mm region of hydrogel. N = 4 images per condition. Parametric unpaired two-tailed t-test. Box plots represent median  $\pm$  IQR, whiskers represent minimum and maximum. ns = not significant.

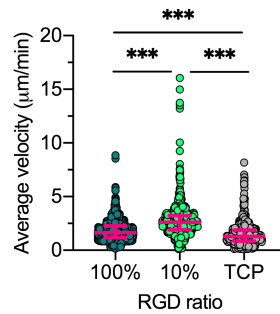

**Figure S3. Average migration velocity of hMSCs.** Average velocity of hMSC tracks on hydrogels of 100% and 10% RGD concentration, compared to TCP controls. N = 613-1203 tracks per condition. Non-parametric Kruskal-Wallis ANOVA with Dunn's multiple comparison test. Dot plots represent median  $\pm$  IQR. \*\*\* $p < 0.001$ .

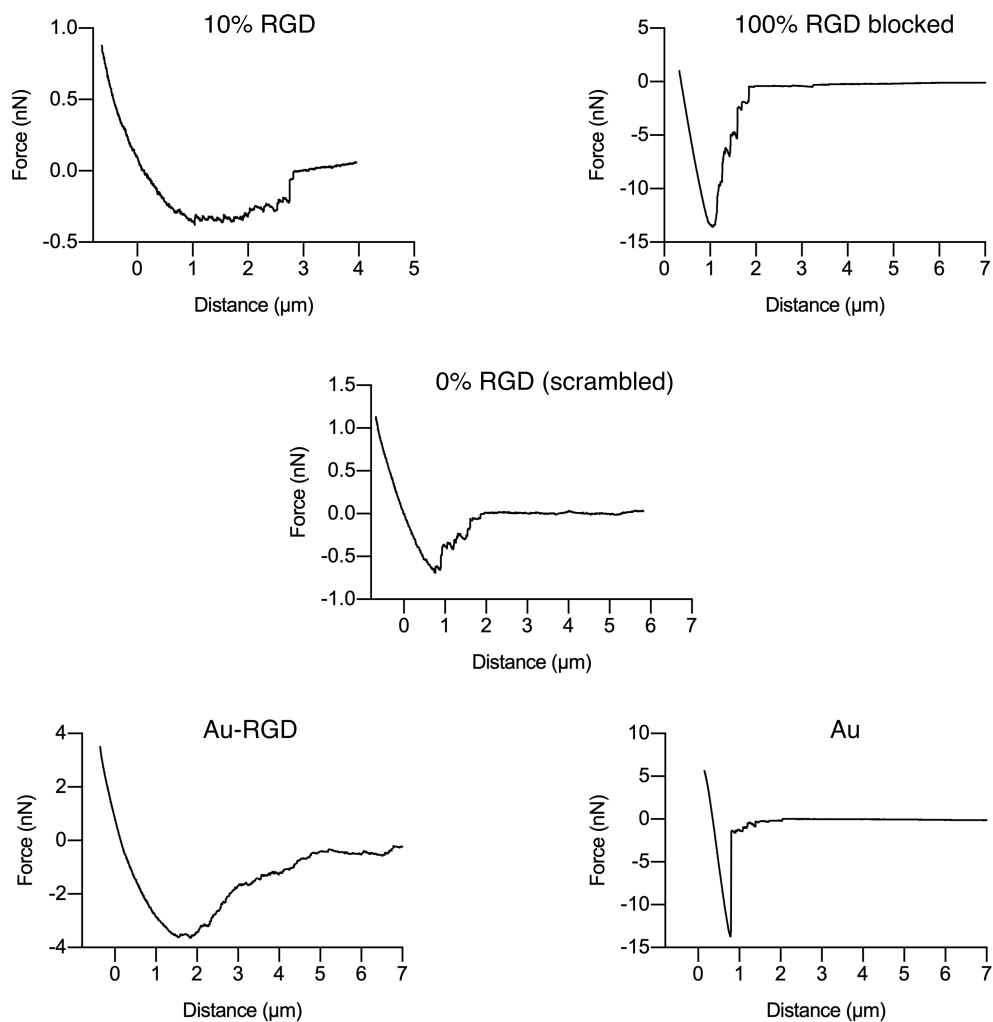

**Figure S4. AFM force curve controls.** Example force-distance curves of hMSC unbinding from 10% RGD hydrogel, 100% RGD hydrogel following blocking of the hMSC in RGD, 0% RGD (scrambled) hydrogel, RGD functionalized gold surface (Au-RGD), and unfunctionalized gold surface (Au).

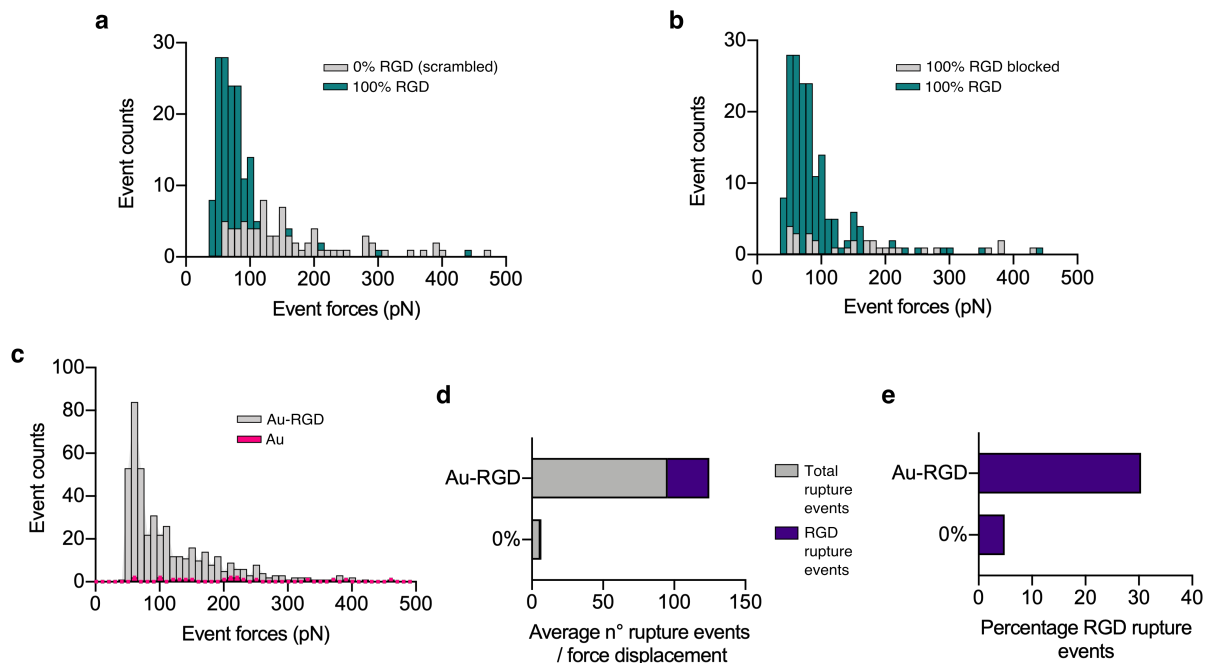

**Figure S5. AFM event forces for controls.** Comparison of total event forces when hMSCs were interfaced with (a) 100% RGD hydrogel and 0% RGD (scrambled) hydrogel, (b) 100% RGD hydrogel and 100% RGD hydrogel following RGD blocking of hMSC, (c) Au and RGD-functionalized Au. (d) Average total and RGD-specific rupture events on 0% RGD hydrogel and RGD functionalized Au substrates. (e) Percentage of RGD rupture events per force displacement curve on 0% RGD hydrogel and RGD functionalized Au substrates.  $N = 3$ ,  $n = 5$  per condition.

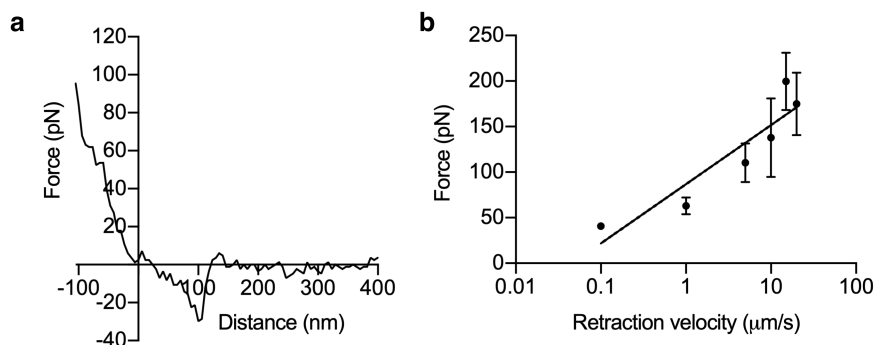

**Figure S6. AFM loading rate.** (a) Representative force-distance curve showing a single molecule unbinding event, between hMSC and 100% RGD hydrogel with a retraction velocity of  $0.1 \mu\text{m/s}$ . (b) Dependence of the average rupture force measured for single molecule unbinding events on the 100% RGD hydrogel with loading rate.  $N = 3$ ,  $n = 40$  per retraction velocity condition.

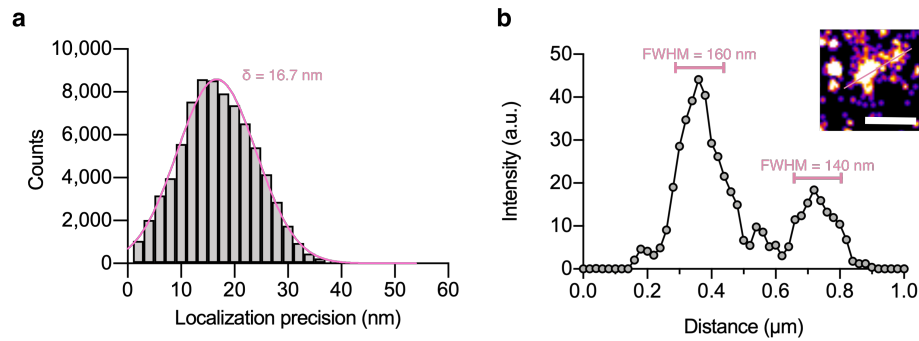

**Figure S7. dSTORM localization precision.** (a) Localization precision of single AlexaFluor647 detections was measured, median = 16.7 nm. (b) Intensity profile of two clusters (line profile inset) gives a full width half maximum (FWHM) of 140-160 nm. Scale bar = 500 nm.

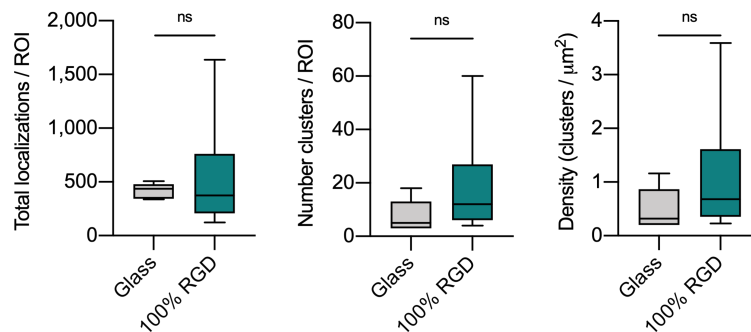

**Figure S8. dSTORM cluster analysis for control.** Analysis of total number of surface localizations, number of clusters and density of clusters of integrin  $\alpha 5\beta 1$  per ROI for hMSCs in contact with untreated glass control and 100% RGD hydrogels. N = 5-15. Welch's unequal variances unpaired two-tailed t-test. Box plots represent median  $\pm$  IQR. ns = not significant.
